# Supplementary material for: PEPICO analysis of catalytic reactor effluents towards quantitative isomer discrimination: DME conversion over a ZSM-5 zeolite
Source: PubMed Central journal article supplement (PMC11226177; doi:10.1107/s1600577524004405), 2024-06-25
Supplement: s-31-00841-sup1.pdf [file s-31-00841-sup1.pdf]

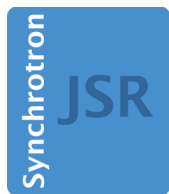

JOURNAL OF  
SYNCHROTRON  
RADIATION

**Volume 31 (2024)**

**Supporting information for article:**

**PEPICO analysis of catalytic reactor effluents towards quantitative isomer discrimination: DME conversion over a ZSM-5 zeolite**

**Morsal Babayan, Evgeniy Redekop, Esko Kokkonen, Unni Olsbye, Marko Huttula and Samuli Urpelainen**

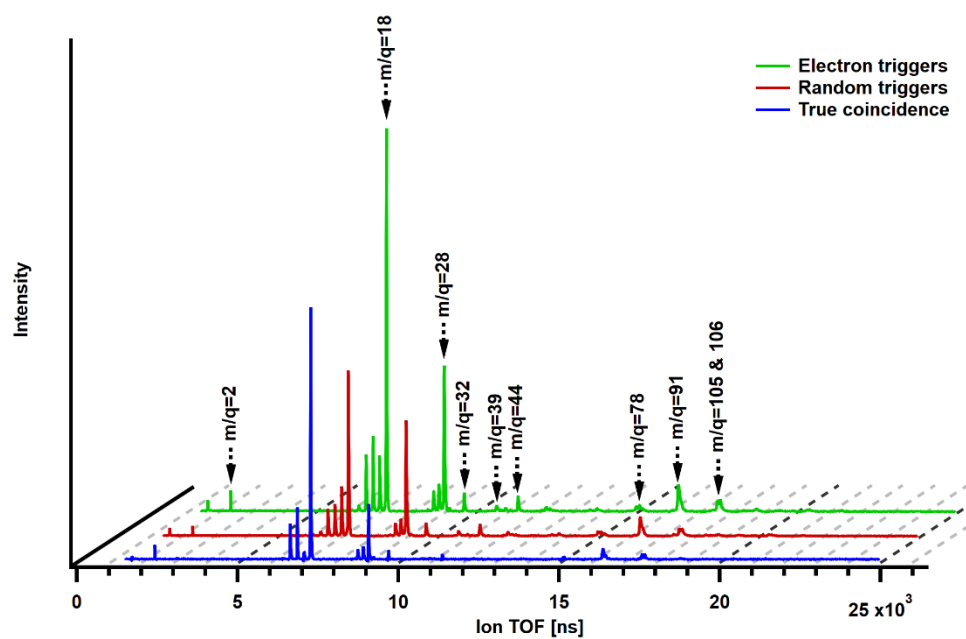

**Figure S1** The TOF mass spectra of ions for random triggers, electron triggers, and true coincidences recorded with photon energy of 40 eV.

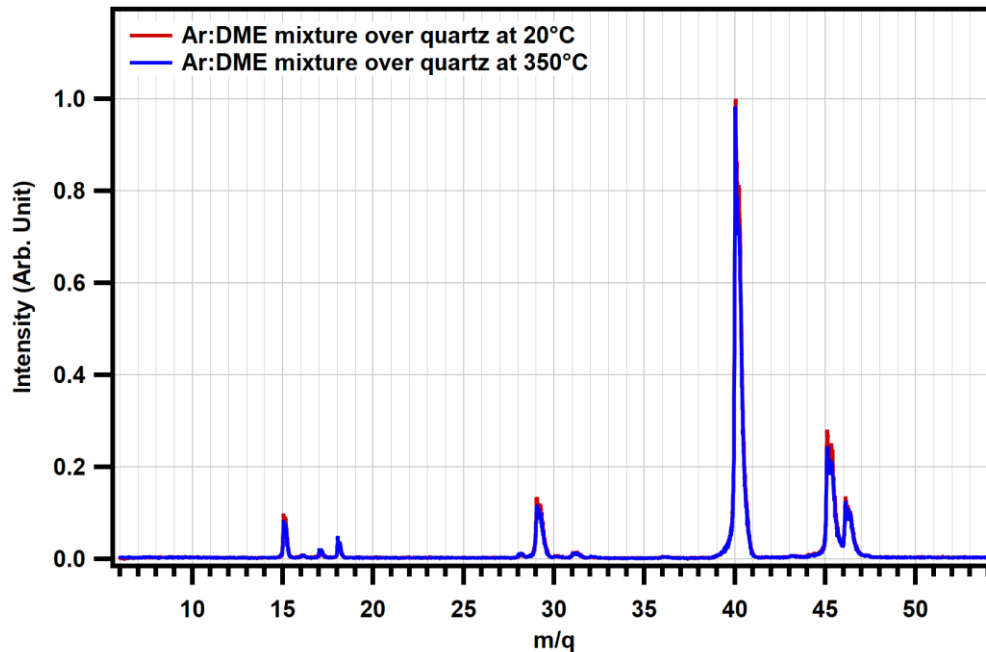

**Figure S2** The TOF mass spectra of a mixture of Ar and DME (3:1 ratio) flowing over the empty reactor at 20 and 350 °C temperatures.

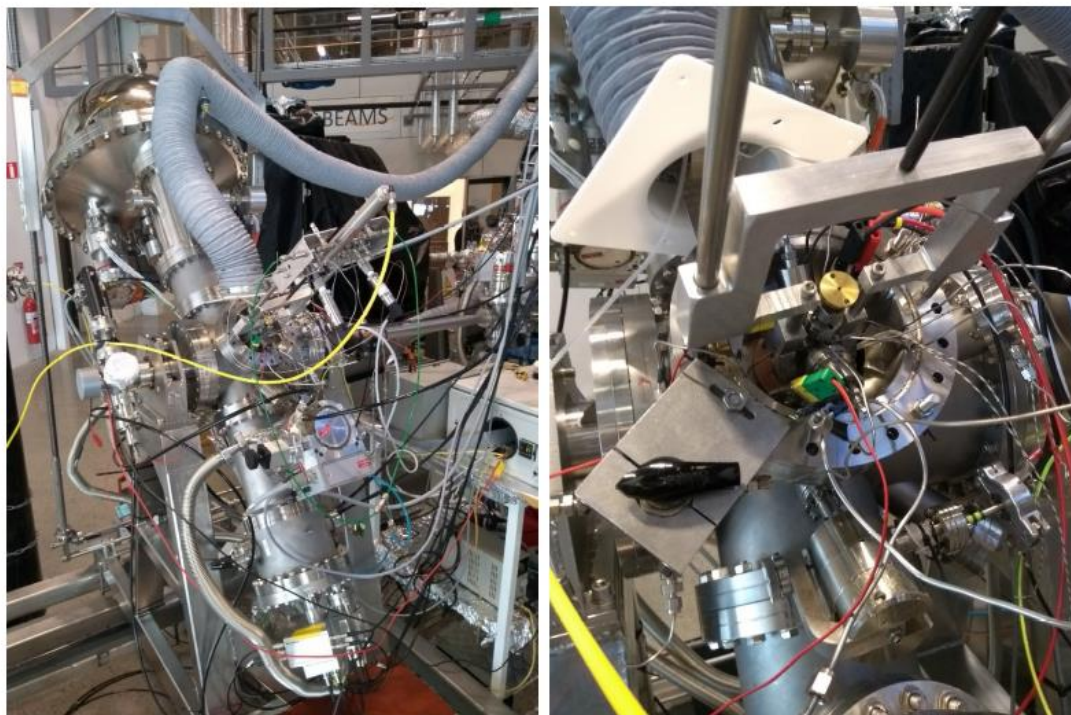

**Figure S3** Photographs of the experimental setup at the GPES.

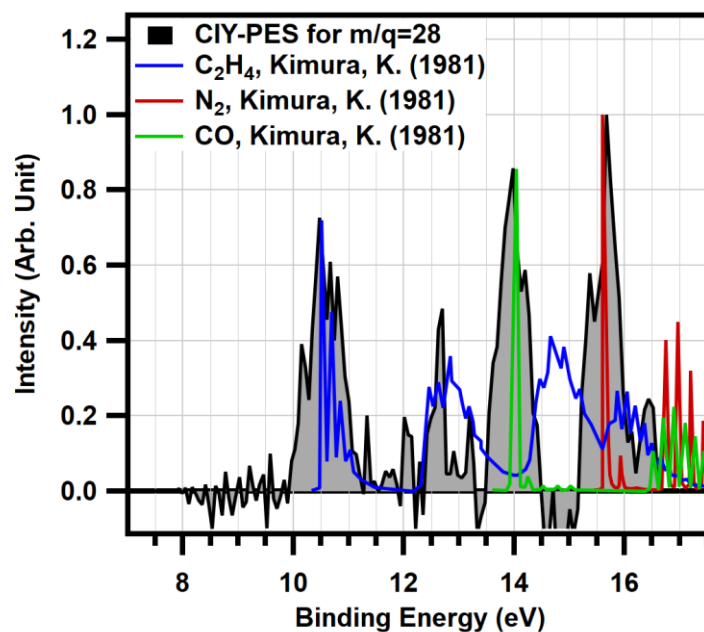

**Figure S4** Comparison of extracted coincidence ion yield PES at 40 eV photon energy with reference spectra for ions with mass 28 (Kimura, 1981).

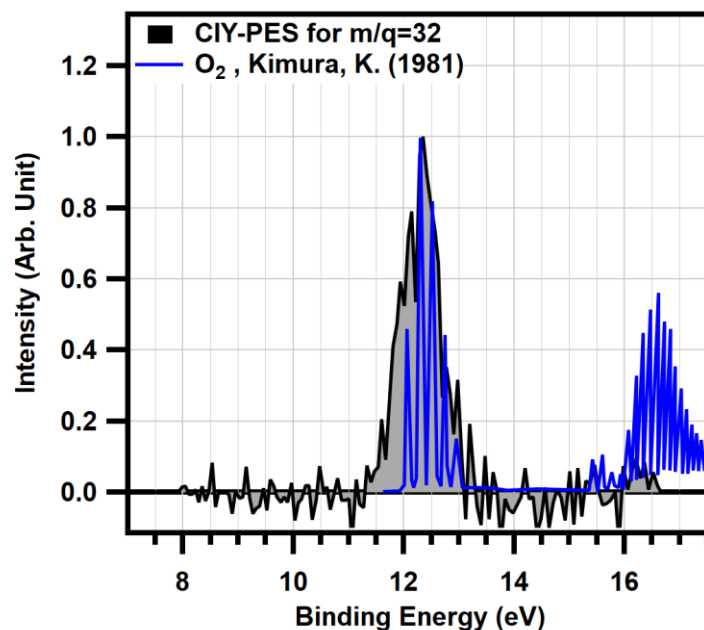

**Figure S5** Comparison of extracted coincidence ion yield PES at 40 eV photon energy with reference spectrum for ions with mass 32 (Kimura, 1981).

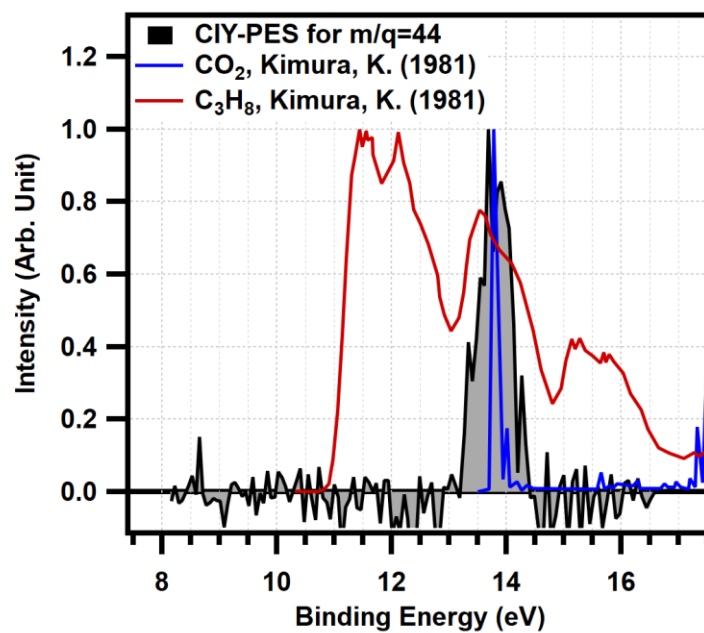

**Figure S6** Comparison of extracted coincidence ion yield PES at 40 eV photon energy with reference spectra for ions with mass 44 (Kimura, 1981).

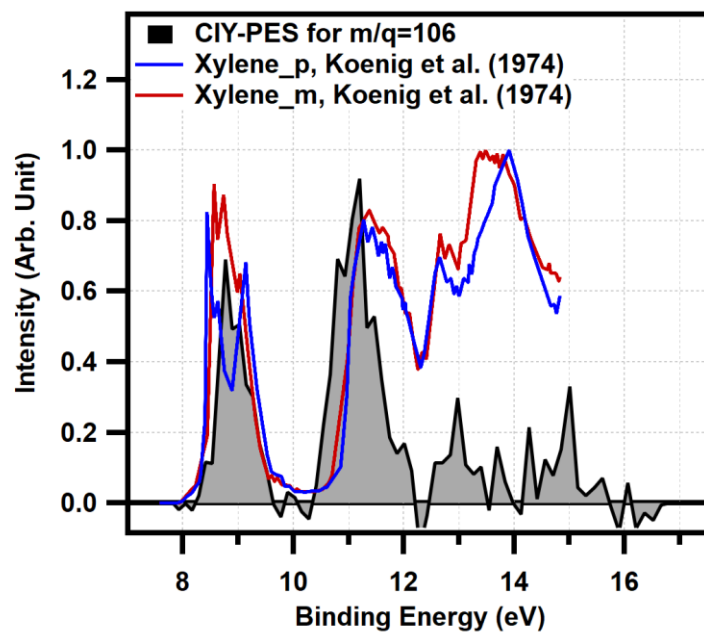

**Figure S7** Comparison of extracted coincidence ion yield PES at 40 eV photon energy with reference spectra for ions with mass 106 (Koenig et al., 1974).

## References

- Kimura, K. (1981). *Handbook of HeI Photoelectron Spectra of Fundamental Organic Molecules*. Halsted Press.
- Koenig, T., Tuttle, M. & Wielessek, R. (1974). *Tetrahedron Lett.* **15**(29), 2537–2540.
